# Supplementary material for: Toward New Epidemiological Landscapes of Trypanosoma cruzi (Kinetoplastida, Trypanosomatidae) Transmission under Future Human-Modified Land Cover and Climatic Change in Mexico
Source: MDPI journal article supplement (doi:10.3390/tropicalmed7090221), 2022-09-02
Supplement: s1 [file s1]

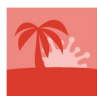

**Table S1.** Species lists of vectors and hosts species confirmed positive for *T. cruzi*.

| Vectors/hosts          | Especies                              |
|------------------------|---------------------------------------|
| Vector                 | <i>Dipetalogaster maxima</i>          |
| Vector                 | <i>Triatoma dimidiata</i>             |
| Vector                 | <i>Triatoma longipennis</i>           |
| Vector                 | <i>Triatoma mazzottii</i>             |
| Vector                 | <i>Triatoma pallidipennis</i>         |
| Vector                 | <i>Triatoma phyllosomus</i>           |
| Vector                 | <i>Triatoma picturatus</i>            |
| Vector                 | <i>Triatoma barberi</i>               |
| Vector                 | <i>Triatoma brailowskyi</i>           |
| Vector                 | <i>Triatoma gerstaeckeri</i>          |
| Vector                 | <i>Triatoma hegneri</i>               |
| Vector                 | <i>Triatoma lecticularia</i>          |
| Vector                 | <i>Triatoma mexicana</i>              |
| Vector                 | <i>Triatoma neotomae</i>              |
| Vector                 | <i>Triatoma nitida</i>                |
| Vector                 | <i>Triatoma protracta</i>             |
| Vector                 | <i>Triatoma recurva</i>               |
| Vector                 | <i>Triatoma rubida</i>                |
| Vector                 | <i>Triatoma sp.</i>                   |
| Vector                 | <i>Panstrongylus rufotuberculatus</i> |
| Vector                 | <i>Rhodnius prolixus</i>              |
| Sylvatic host          | <i>Alouatta palliata</i>              |
| Sylvatic host          | <i>Alouatta villosa</i>               |
| Sylvatic host          | <i>Balantiopteryx plicata</i>         |
| Sylvatic host          | <i>Dermanura sp.</i>                  |
| Sylvatic host          | <i>Heteromys desmarestianus</i>       |
| Sylvatic host          | <i>Leptonycteris curasoae</i>         |
| Sylvatic host          | <i>Macroctus waterhousii</i>          |
| Sylvatic host          | <i>Marmosa mexicana</i>               |
| Sylvatic host          | <i>Mormoops megalophylla</i>          |
| Sylvatic host          | <i>Oryzomys couesi</i>                |
| Sylvatic host          | <i>Ototylomys phyllotis</i>           |
| Sylvatic host          | <i>Peromyscus leucopus</i>            |
| Sylvatic host          | <i>Peromyscus mexicanus</i>           |
| Sylvatic host          | <i>Sigmodon toltecus</i>              |
| Sylvatic-domestic host | <i>Artibeus jamaicensis</i>           |
| Sylvatic-domestic host | <i>Artibeus lituratus</i>             |
| Sylvatic-domestic host | <i>Baiomys musculus</i>               |
| Sylvatic-domestic host | <i>Carollia sowelli</i>               |
| Sylvatic-domestic host | <i>Choeronycteris mexicana</i>        |
| Sylvatic-domestic host | <i>Dasypus novemcinctus</i>           |
| Sylvatic-domestic host | <i>Dermanura phaeotis</i>             |
| Sylvatic-domestic host | <i>Desmodus rotundus</i>              |
| Sylvatic-domestic host | <i>Didelphis marsupialis</i>          |

|                        |                                   |
|------------------------|-----------------------------------|
| Sylvatic-domestic host | <i>Didelphis virginiana</i>       |
| Sylvatic-domestic host | <i>Glossophaga soricina</i>       |
| Sylvatic-domestic host | <i>Heteromys gaumeri</i>          |
| Sylvatic-domestic host | <i>Heteromys irroratus</i>        |
| Sylvatic-domestic host | <i>Leptonycteris yerbabuenae</i>  |
| Sylvatic-domestic host | <i>Mephitis mephitis</i>          |
| Sylvatic-domestic host | <i>Micronycteris megalotis</i>    |
| Sylvatic-domestic host | <i>Molossus rufus</i>             |
| Sylvatic-domestic host | <i>Myotis keaysi</i>              |
| Sylvatic-domestic host | <i>Nasua narica</i>               |
| Sylvatic-domestic host | <i>Neotoma mexicana</i>           |
| Sylvatic-domestic host | <i>Neotoma micropus</i>           |
| Sylvatic-domestic host | <i>Noctilio leporinus</i>         |
| Sylvatic-domestic host | <i>Otospermophilus variegatus</i> |
| Sylvatic-domestic host | <i>Peromyscus levipes</i>         |
| Sylvatic-domestic host | <i>Peromyscus melanophrys</i>     |
| Sylvatic-domestic host | <i>Peromyscus yucatanicus</i>     |
| Sylvatic-domestic host | <i>Philander opossum</i>          |
| Sylvatic-domestic host | <i>Procyon lotor</i>              |
| Sylvatic-domestic host | <i>Pteronotus parnellii</i>       |
| Sylvatic-domestic host | <i>Pteronotus davyi</i>           |
| Sylvatic-domestic host | <i>Reithrodontomys fulvescens</i> |
| Sylvatic-domestic host | <i>Reithrodontomys gracilis</i>   |
| Sylvatic-domestic host | <i>Rhogeessa parvula</i>          |
| Sylvatic-domestic host | <i>Sigmodon hispidus</i>          |
| Sylvatic-domestic host | <i>Sturnira lilium</i>            |
| Sylvatic-domestic host | <i>Sturnira ludovici</i>          |
| Sylvatic-domestic host | <i>Sturnira parvidens</i>         |
| Sylvatic-domestic host | <i>Uroderma bilobatum</i>         |
| Domestic host          | <i>Canis familiaris</i>           |
| Domestic host          | <i>Felis catus</i>                |
| Domestic host          | <i>Bos taurus</i>                 |
| Domestic host          | <i>Capra hircus</i>               |
| Domestic host          | <i>Equus asinus</i>               |
| Domestic host          | <i>Equus caballus</i>             |
| Domestic host          | <i>Ovis aries</i>                 |
| Domestic host          | <i>Oryctolagus cuniculus</i>      |
| Domestic host          | <i>Sus domesticus</i>             |
| Synanthropic host      | <i>Rattus norvegicus</i>          |
| Synanthropic host      | <i>Rattus rattus</i>              |
| Synanthropic host      | <i>Mus musculus</i>               |

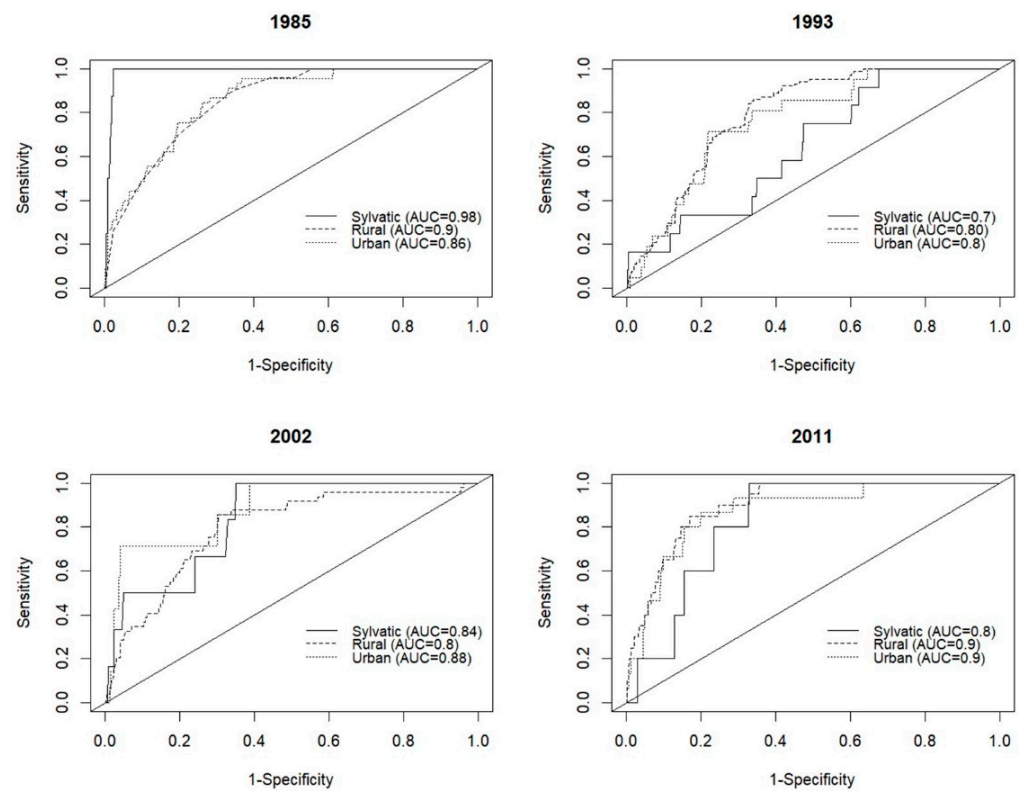

**Figure S1.** AUC values of 1985 baseline LUCC-Climate model and projections to 1993, 2002, and 2011 for each *T. cruzi* transmission cycle.
